# Supplementary material for: One-step preparation of amorphous citrate-chelated CoNiFe trimetallic hydroxides for the oxygen evolution reaction
Source: Royal Society of Chemistry journal article supplement (doi:10.1039/d4nj04240a), 2024-11-25
Supplement: d4nj04240a1.pdf [file d4nj04240a1.pdf]

## One-step Preparation of Amorphous Citrate-Chelated CoNiFe Trimetallic Hydroxides for Oxygen Evolution Reaction

Jiaqi Zhou,<sup>a</sup> Yuhong Zhang,<sup>a</sup> Tianrui Yu,<sup>a</sup> Tong Wang,<sup>a</sup> Chuangyi Tong,<sup>a</sup> Mingxin Feng,<sup>a</sup> Zewu Zhang,<sup>b</sup> Jiehua Bao\*<sup>b</sup> and Yuming Zhou\*<sup>a</sup>

<sup>a</sup> School of Chemistry and Chemical Engineering, Southeast University, Jiangsu Optoelectronic Functional Materials and Engineering Research Center, Nanjing, 211100, Jiangsu Province, China

<sup>b</sup> School of Materials Science and Engineering, Nanjing Institute of Technology, Nanjing, 211167, Jiangsu Province, China

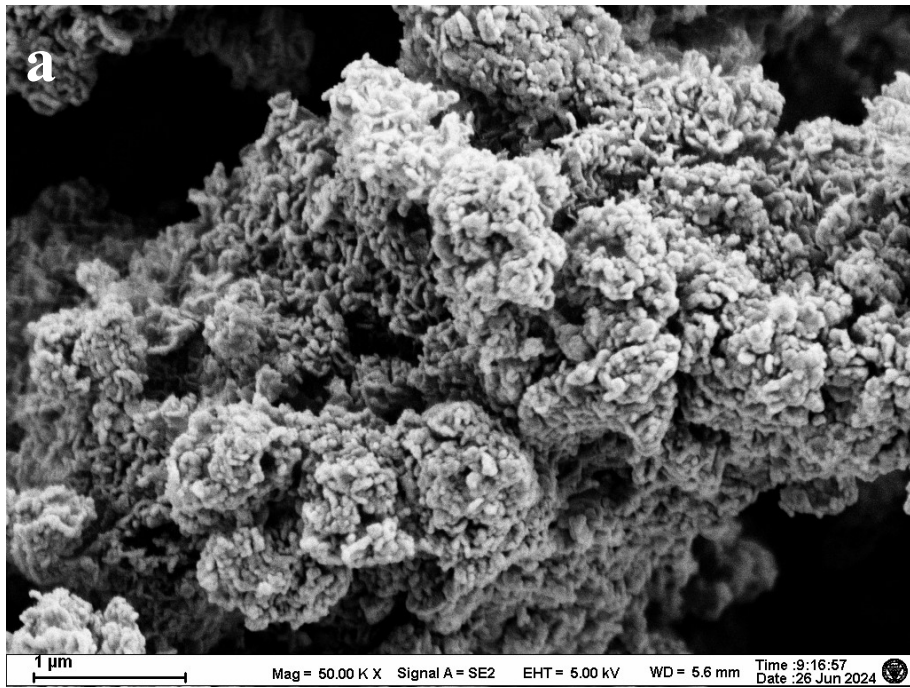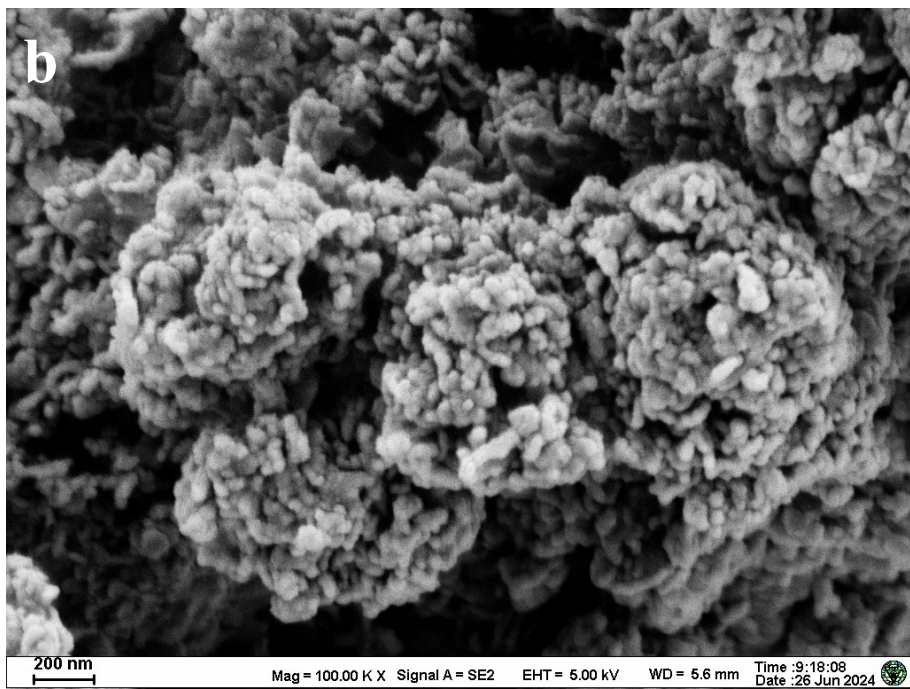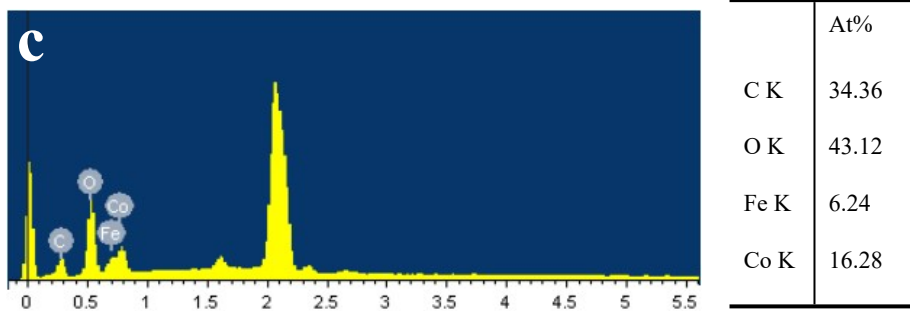

Figure S1. (a-b) SEM images and (c) EDX result of  $\text{Co}_3\text{Fe-W}$ .

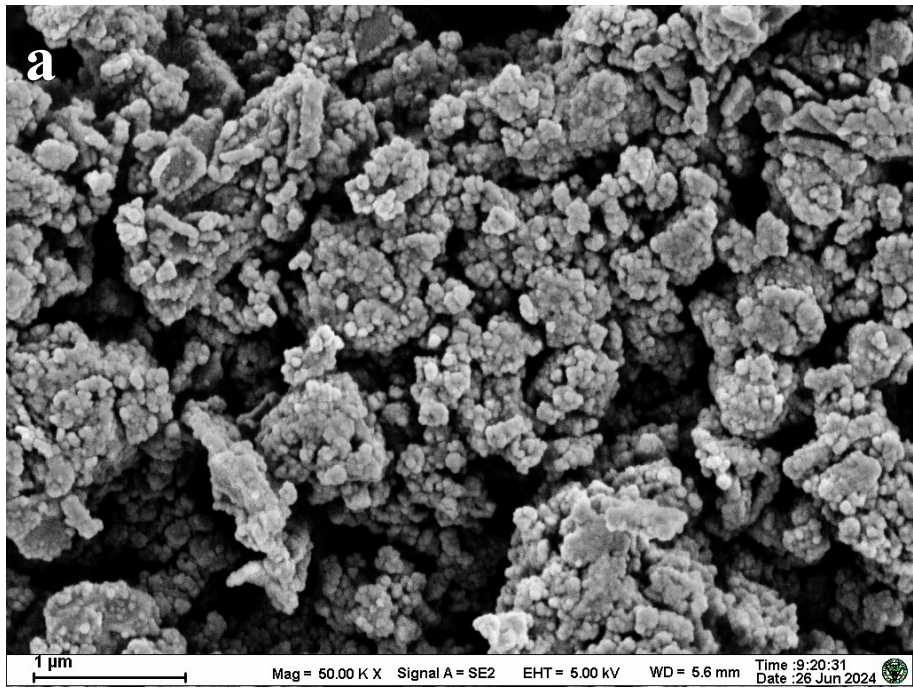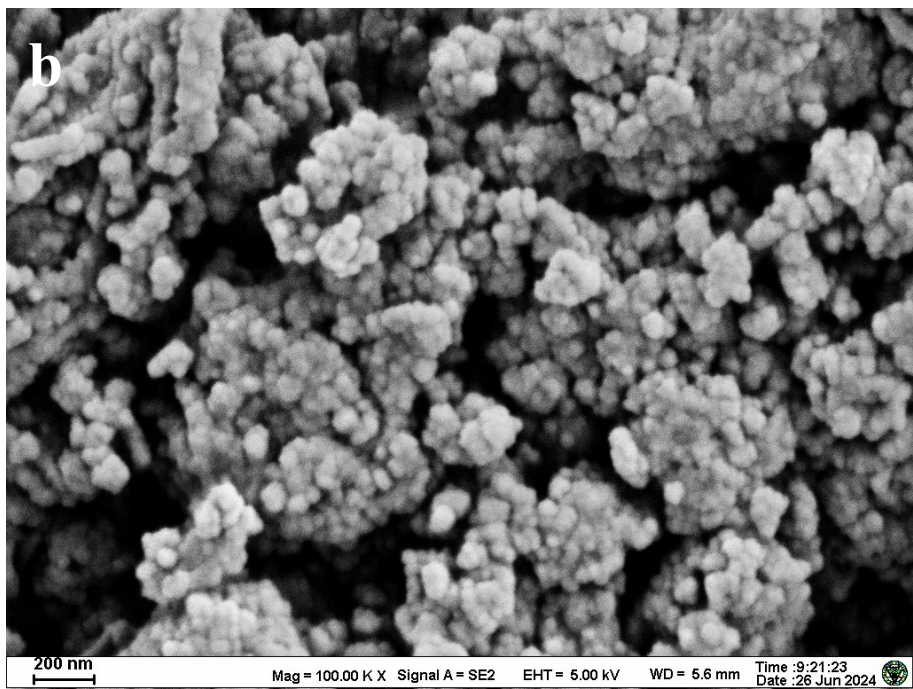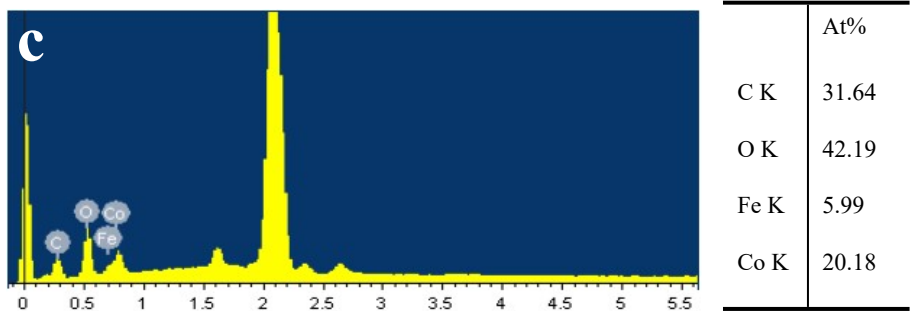

Figure S2. (a-b) SEM images and (c) EDX result of  $\text{Co}_3\text{Fe-E}$ .

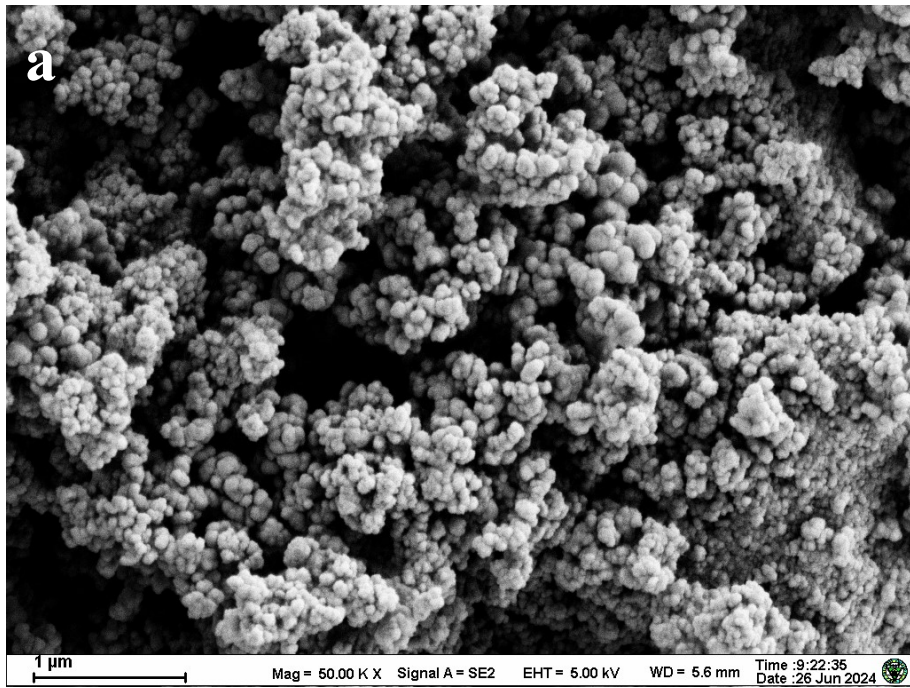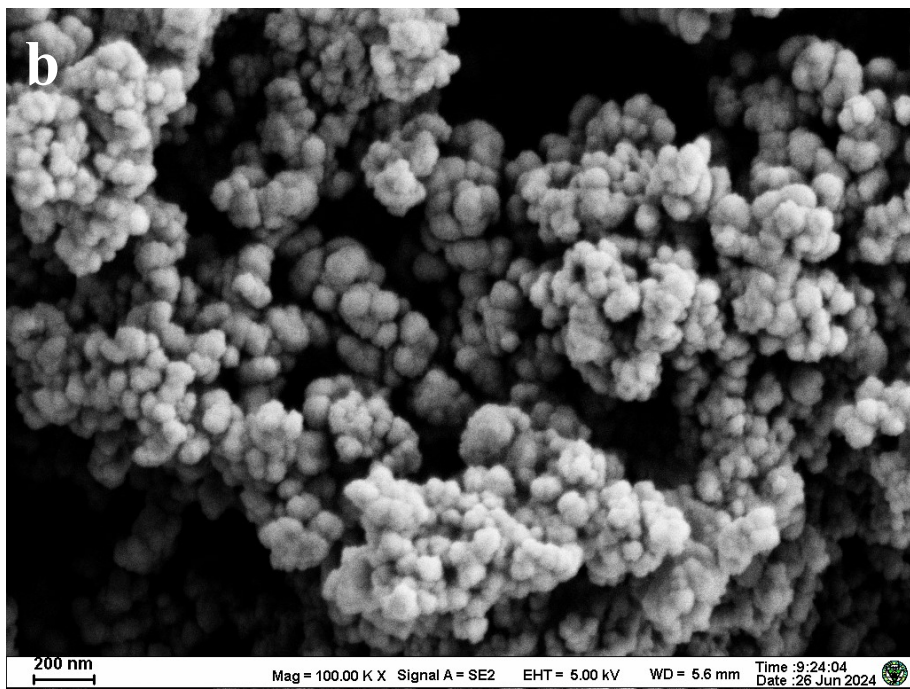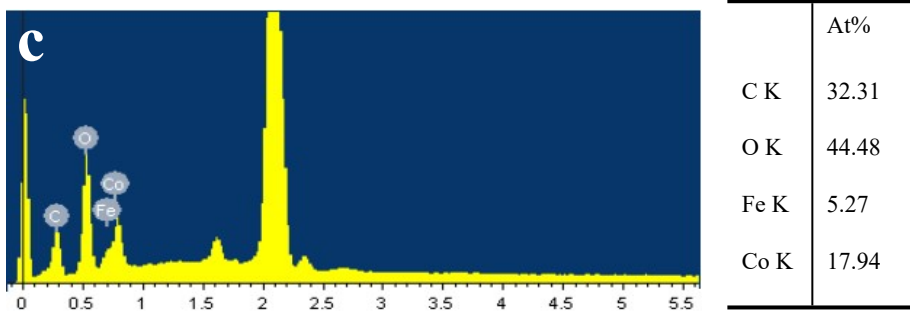

Figure S3. (a-b) SEM images and (c) EDX result of  $\text{Co}_3\text{Fe-W/E}$ .

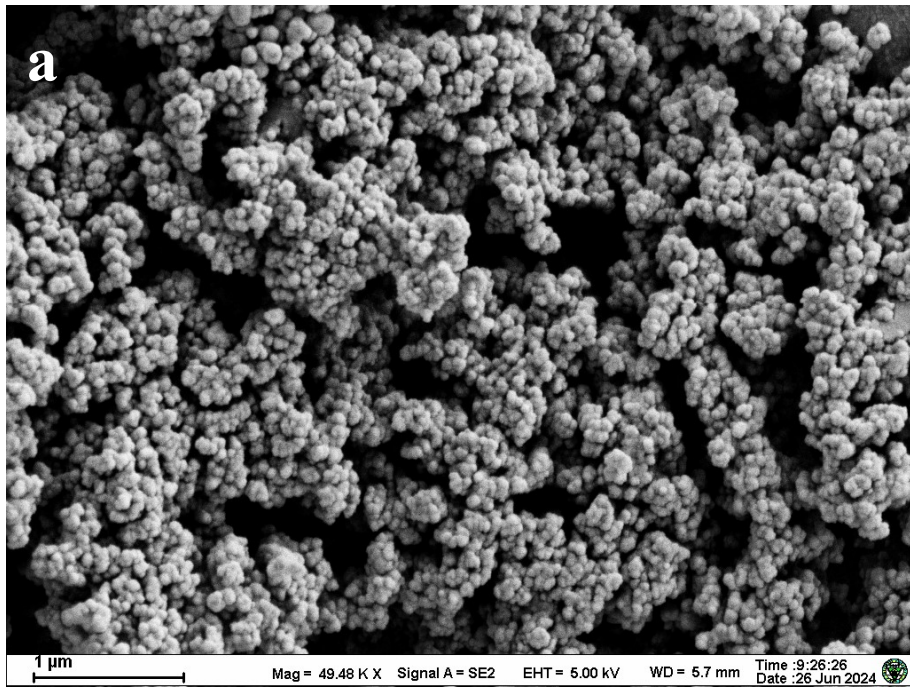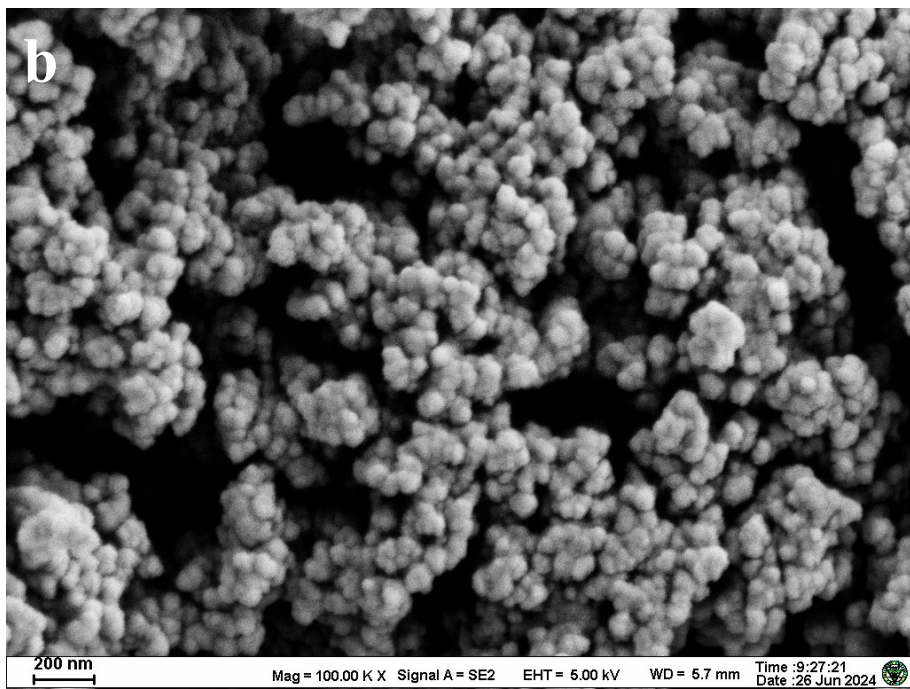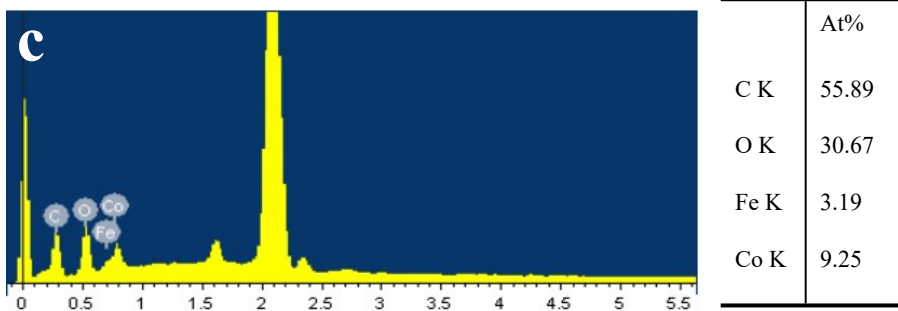

Figure S4. (a-b) SEM images and (c) EDX result of  $\text{Co}_3\text{Fe-CA}$ .

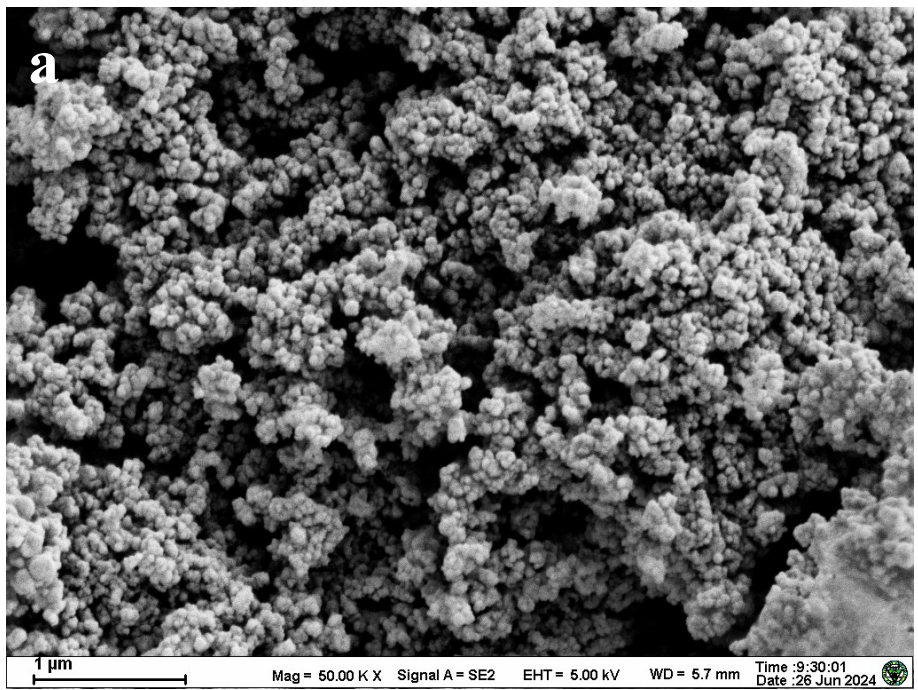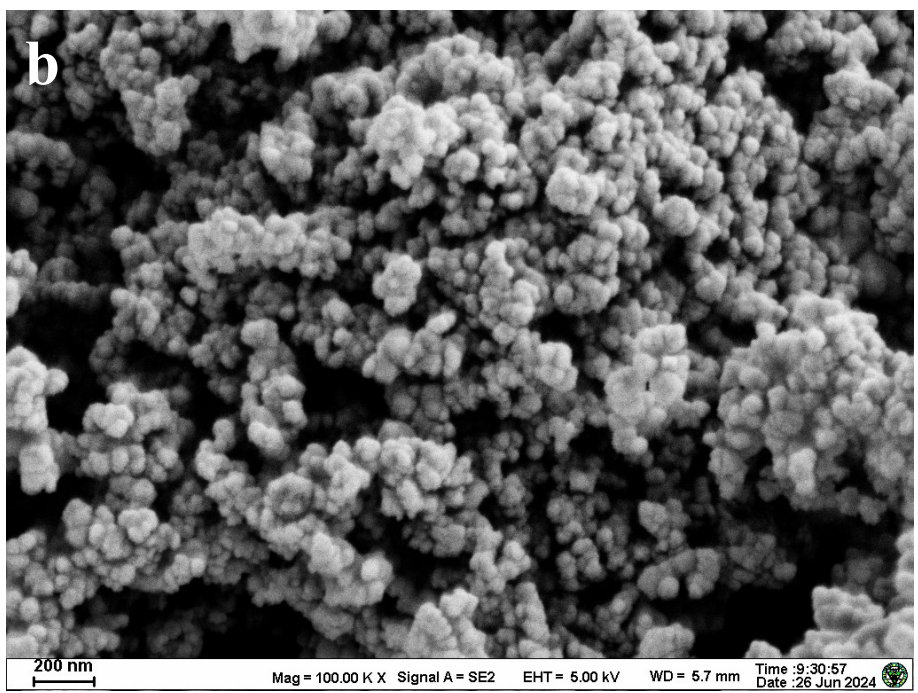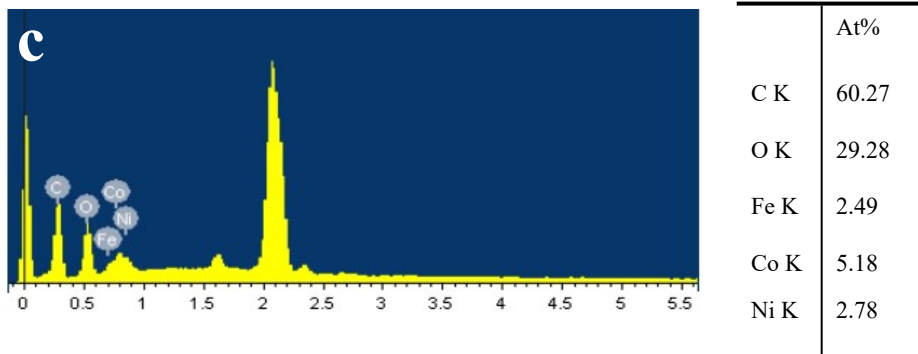

Figure S5. (a-b) SEM images and (c) EDX result of  $\text{Co}_2\text{NiFe-CA}$ .

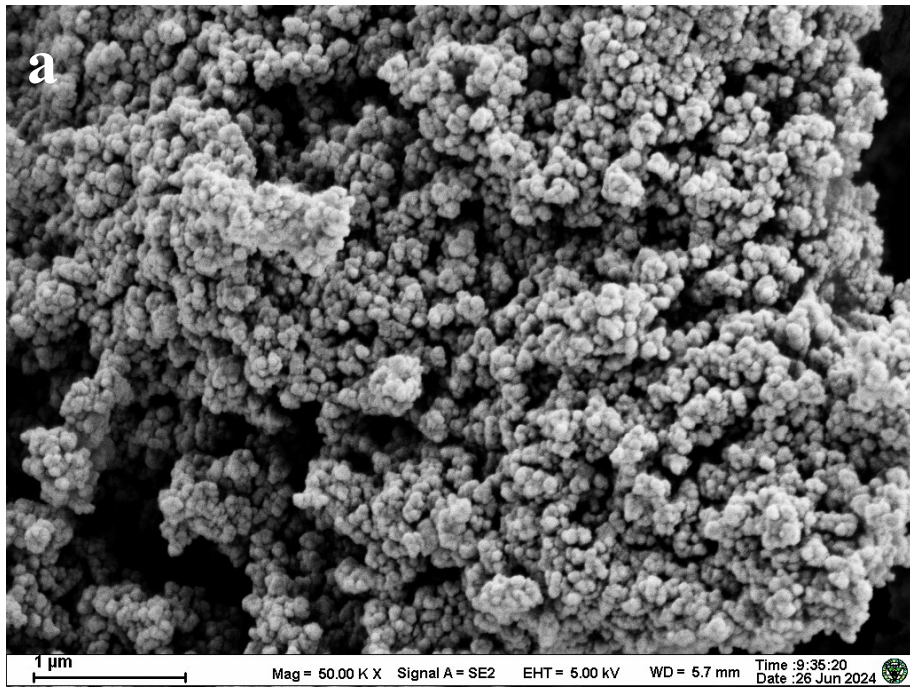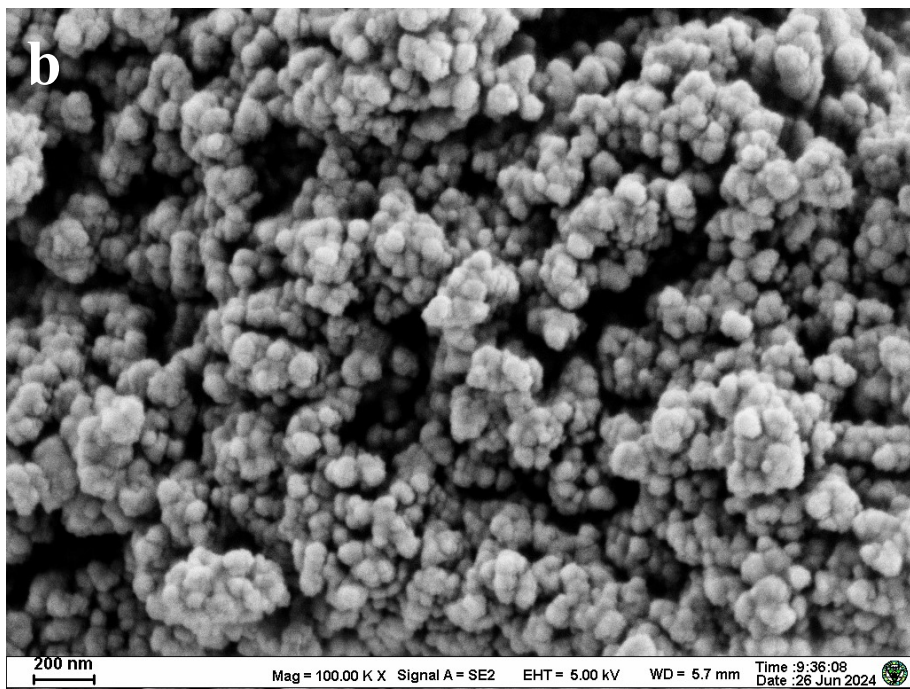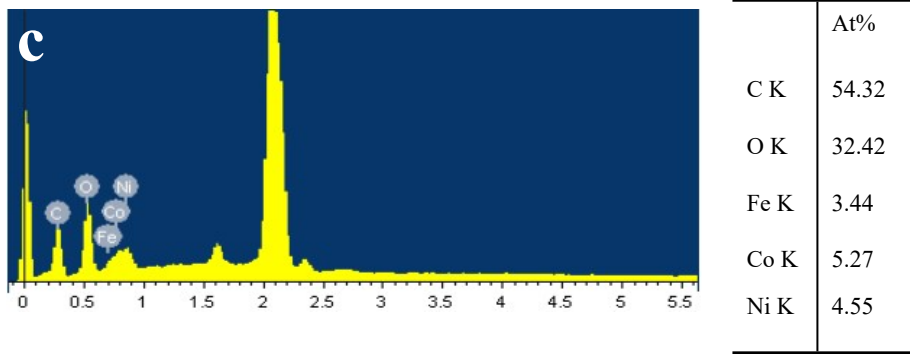

Figure S6. (a-b) SEM images and (c) EDX result of  $\text{Co}_{1.5}\text{Ni}_{1.5}\text{Fe-CA}$ .

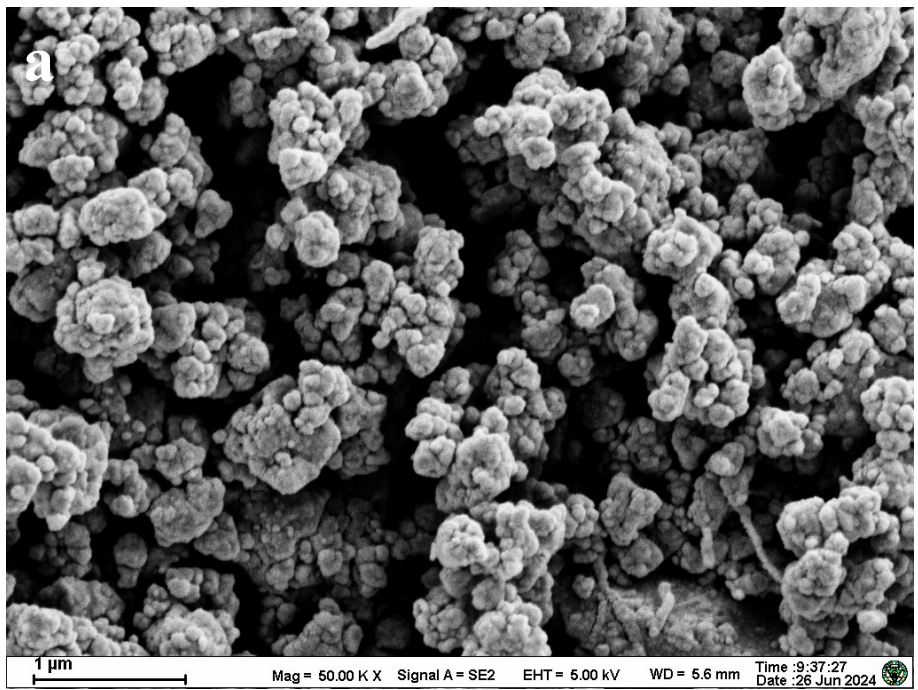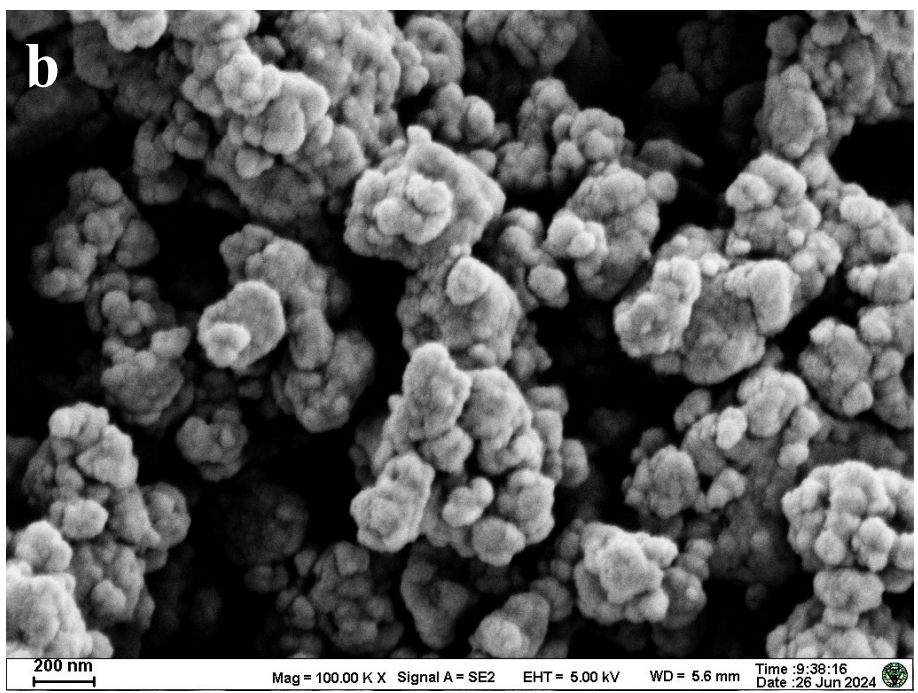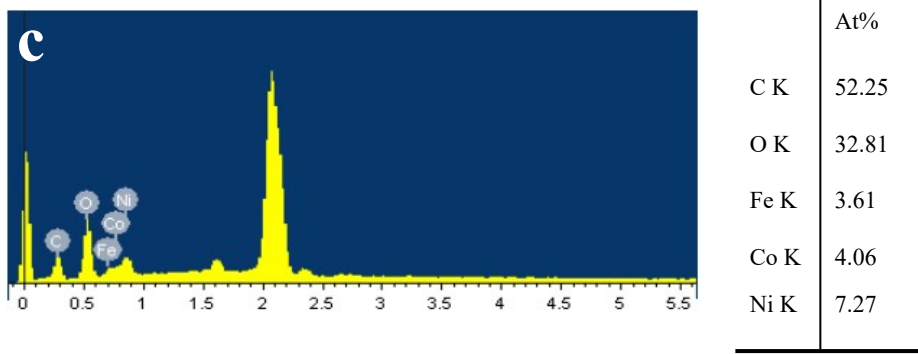

Figure S7. (a-b) SEM images and (c) EDX result of CoNi<sub>2</sub>Fe-CA.



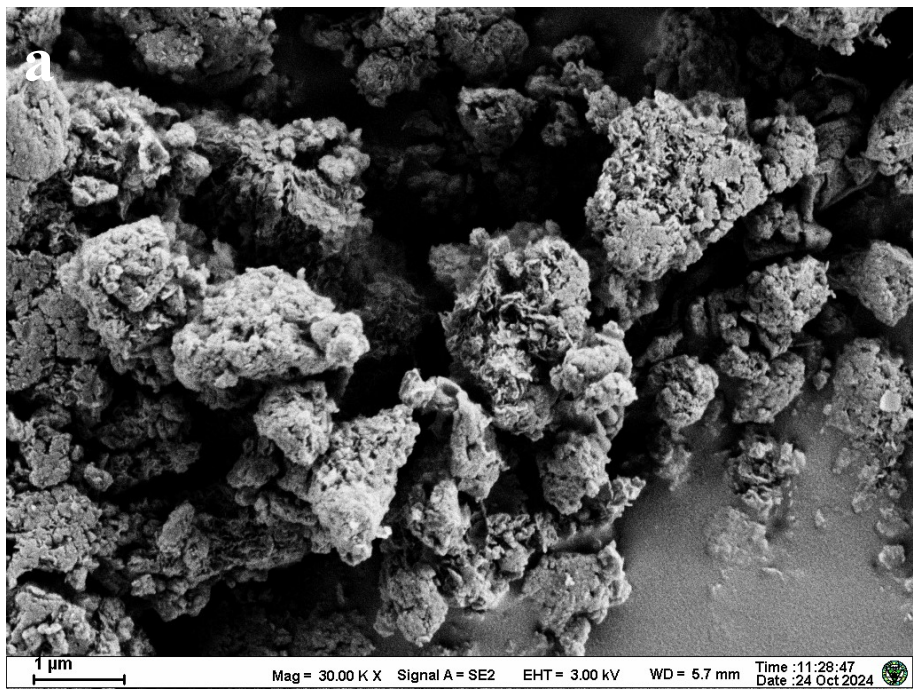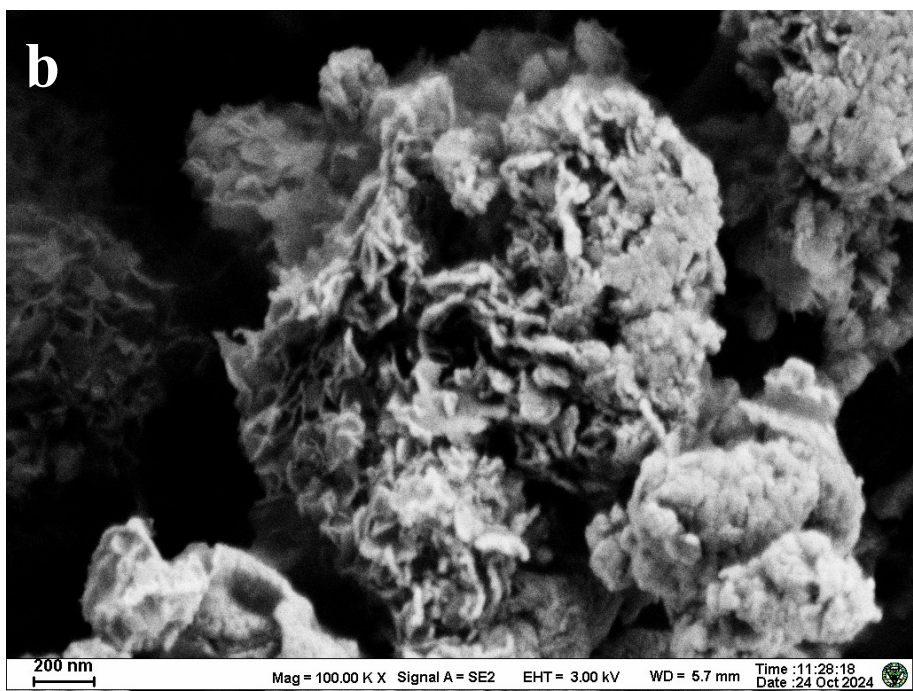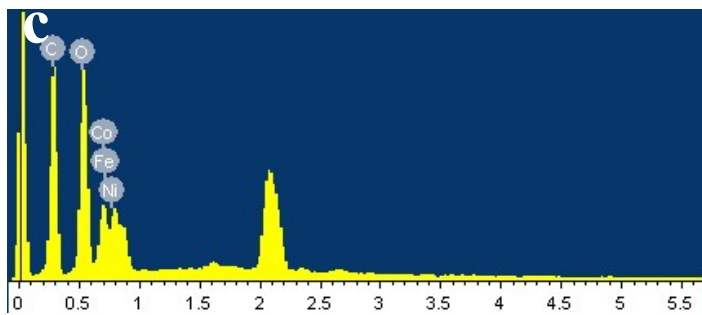

|      | At%   |
|------|-------|
| C K  | 55.96 |
| O K  | 38.34 |
| Fe K | 1.44  |
| Co K | 2.73  |
| Ni K | 1.53  |

Figure S8. (a-b) SEM images and (c) EDX result of  $\text{Co}_2\text{NiFe-CS}$ .

Figure S9. (a-f) Size distribution of the (a)  $\text{Co}_3\text{Fe-E}$ , (b)  $\text{Co}_3\text{Fe-W/E}$ , (c)  $\text{Co}_3\text{Fe-CA}$ , (d)  $\text{Co}_2\text{NiFe-CA}$ , (e)  $\text{Co}_{1.5}\text{Ni}_{1.5}\text{Fe-CA}$  and (f)  $\text{CoNiFe-CA}$ .

**a**

**b**

**c**

**d**

**e**

**f**

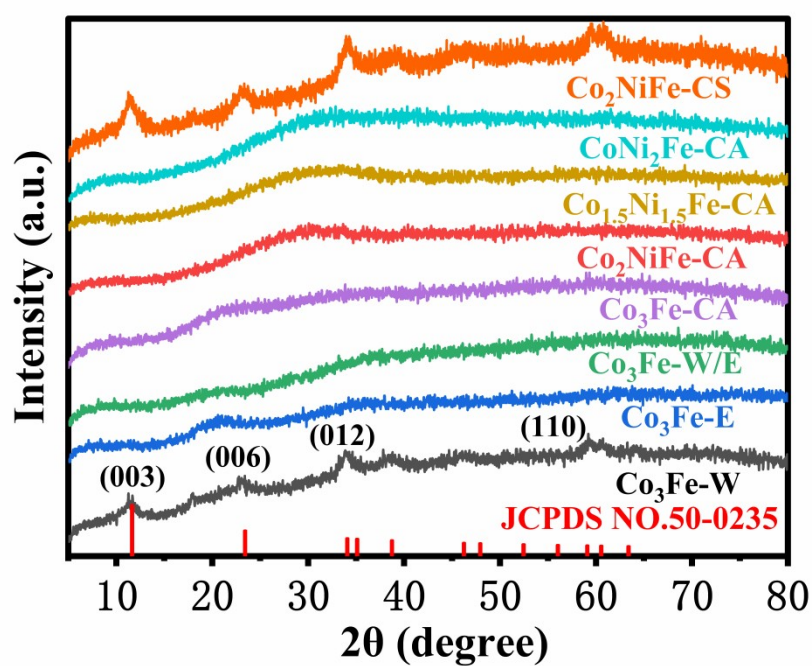

Figure S10. XRD images of all catalysts.

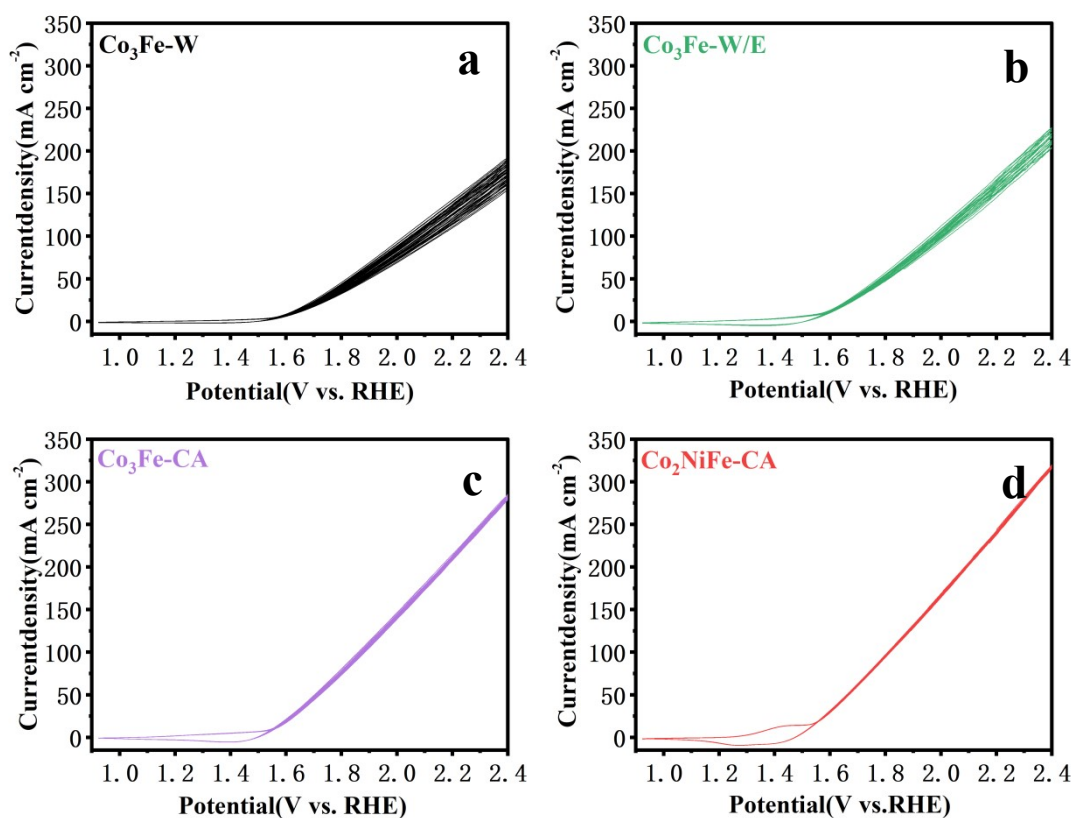

Figure S11. (a-d) CV curves of the (a)  $\text{Co}_3\text{Fe-W}$ , (b)  $\text{Co}_3\text{Fe-W/E}$ , (c)  $\text{Co}_3\text{Fe-CA}$  and (d)  $\text{Co}_2\text{NiFe-CA}$ .

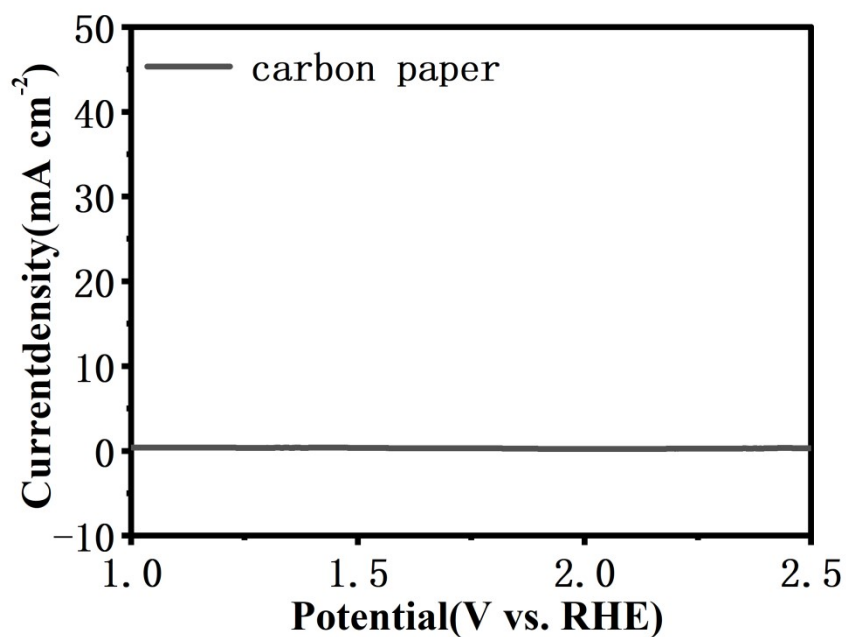

Figure S12. OER activity of carbon paper.

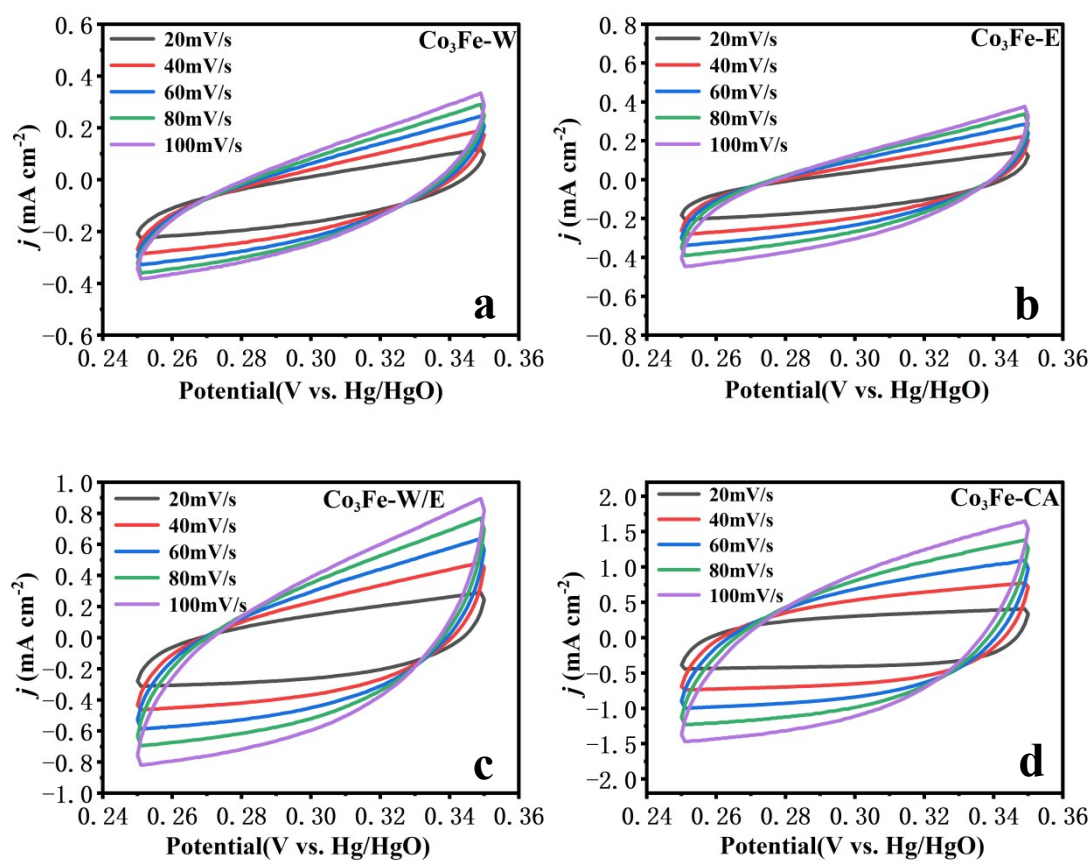

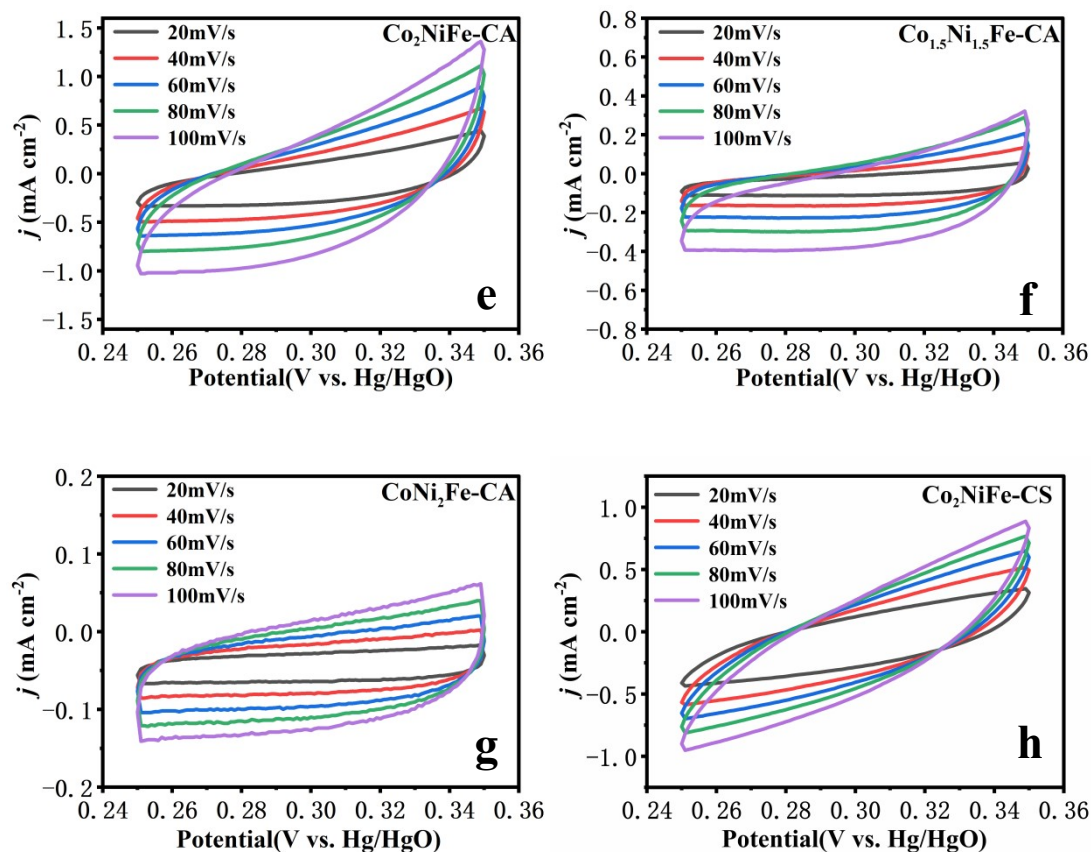

Figure S13. (a-h) CV curves of the (a)  $\text{Co}_3\text{Fe-W}$ , (b)  $\text{Co}_3\text{Fe-E}$ , (c)  $\text{Co}_3\text{Fe-W/E}$ , (d)  $\text{Co}_3\text{Fe-CA}$ , (e)  $\text{Co}_2\text{NiFe-CA}$ , (f)  $\text{Co}_{1.5}\text{Ni}_{1.5}\text{Fe-CA}$ , (g)  $\text{CoNi}_2\text{Fe-CA}$  and (h)  $\text{Co}_2\text{NiFe-CS}$ .

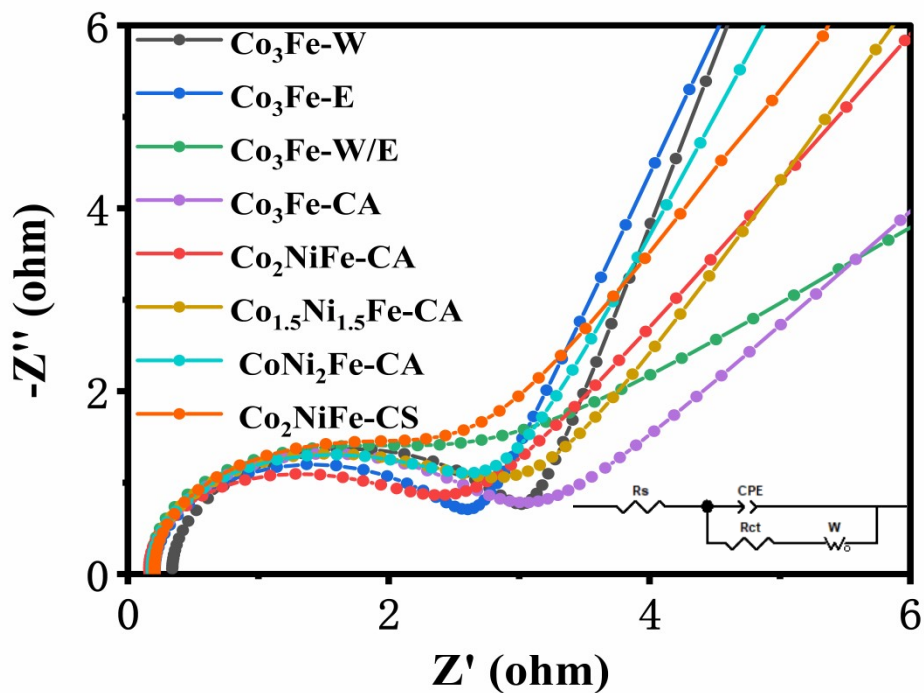

Figure S14. Nyquist plots for all catalysts.

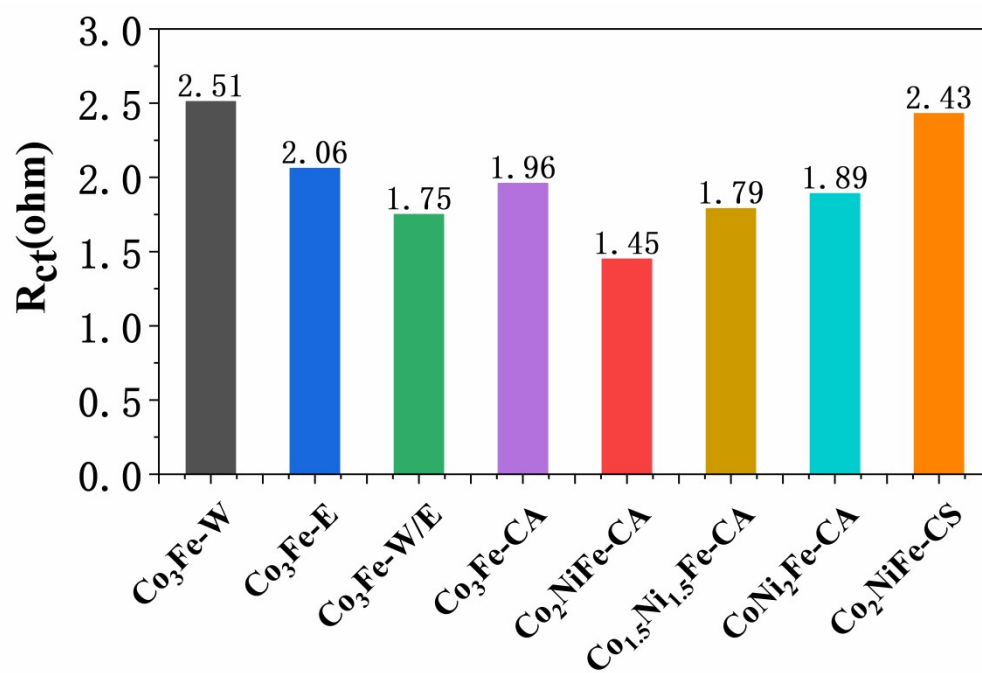

Figure S15. The values of  $R_{ct}$ .

**a**

**b**

**c**

**d**

**e****f****g****h**

Figure S16. (a-h) Chronopotentiometric curves of the (a)  $\text{Co}_3\text{Fe-W}$ , (b)  $\text{Co}_3\text{Fe-E}$ , (c)  $\text{Co}_3\text{Fe-W/E}$ , (d)  $\text{Co}_3\text{Fe-CA}$ , (e)  $\text{Co}_2\text{NiFe-CA}$ , (f)  $\text{Co}_{1.5}\text{Ni}_{1.5}\text{Fe-CA}$ , (g)  $\text{CoNi}_2\text{Fe-CA}$  and (h)  $\text{Co}_2\text{NiFe-CS}$  at  $10 \text{ mA cm}^{-2}$ .

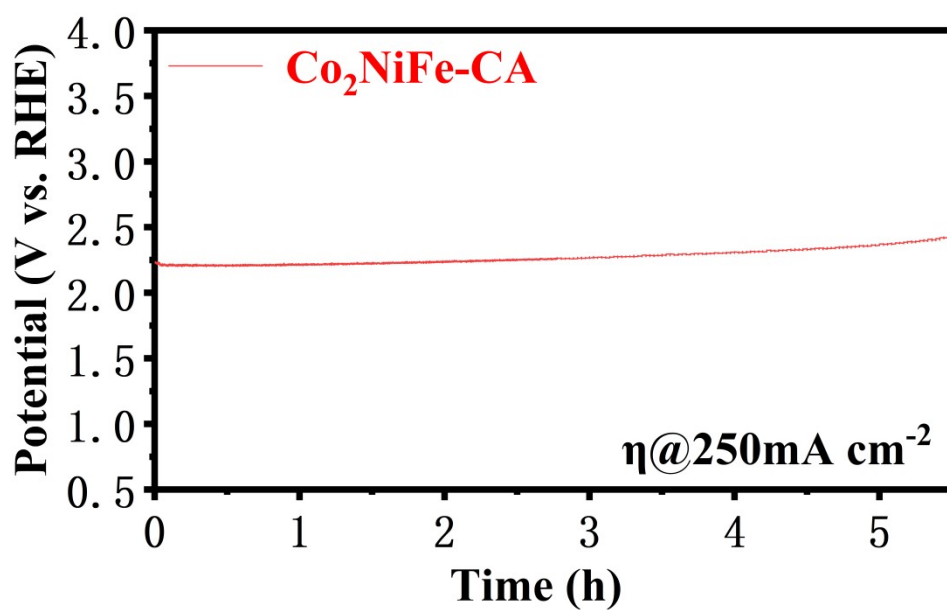

Figure S17. Chronopotentiometric curve of the  $\text{Co}_2\text{NiFe-CA}$  at  $250 \text{ mA cm}^{-2}$ .

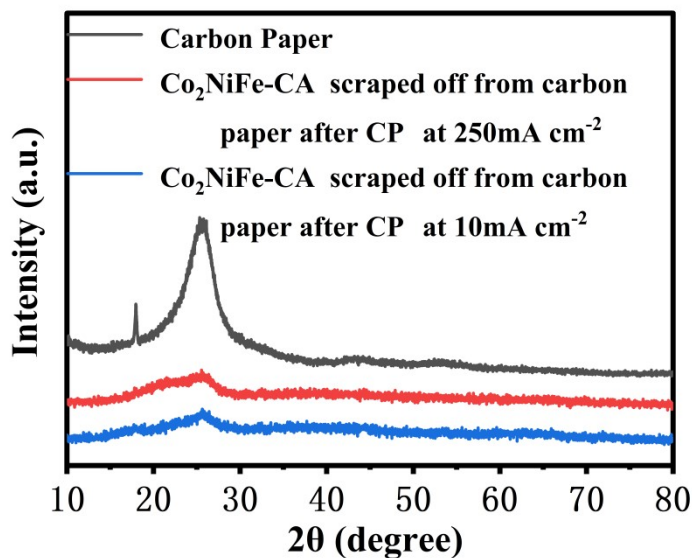

Figure S18. XRD images of carbon paper and Co<sub>2</sub>NiFe-CA after CP at 10 mA cm<sup>-2</sup> and 250 mA cm<sup>-2</sup>.

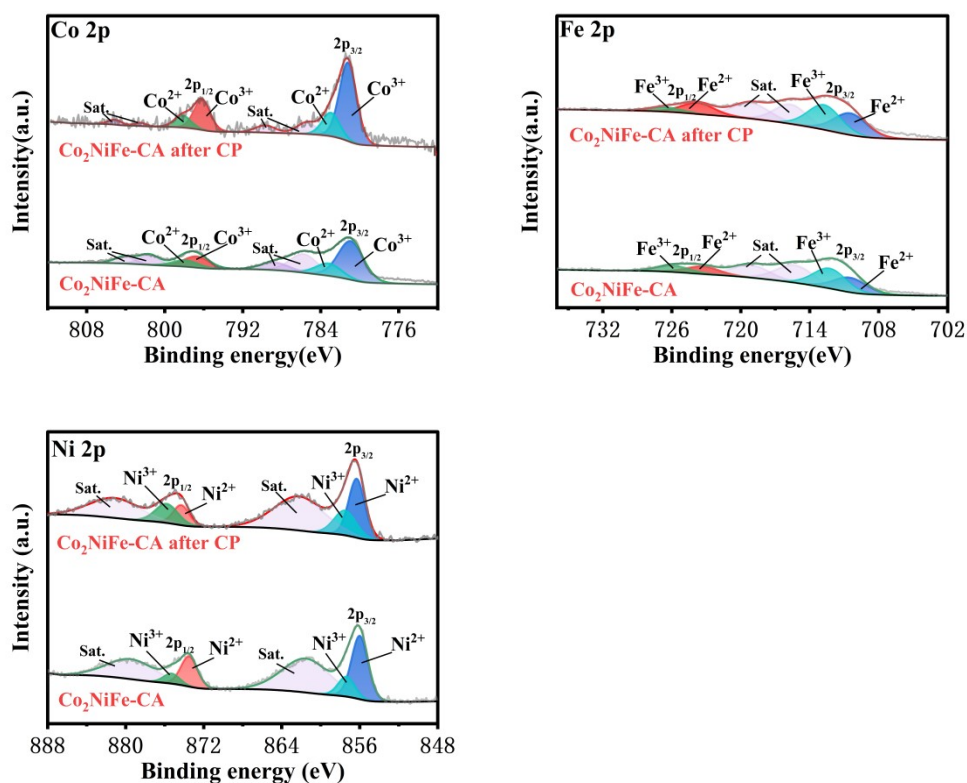

Figure S19. High resolution XPS spectra for (a) Co 2p, (b) Fe 2p and (c) Ni 2p before and after CP at 250 mA cm<sup>-2</sup>.



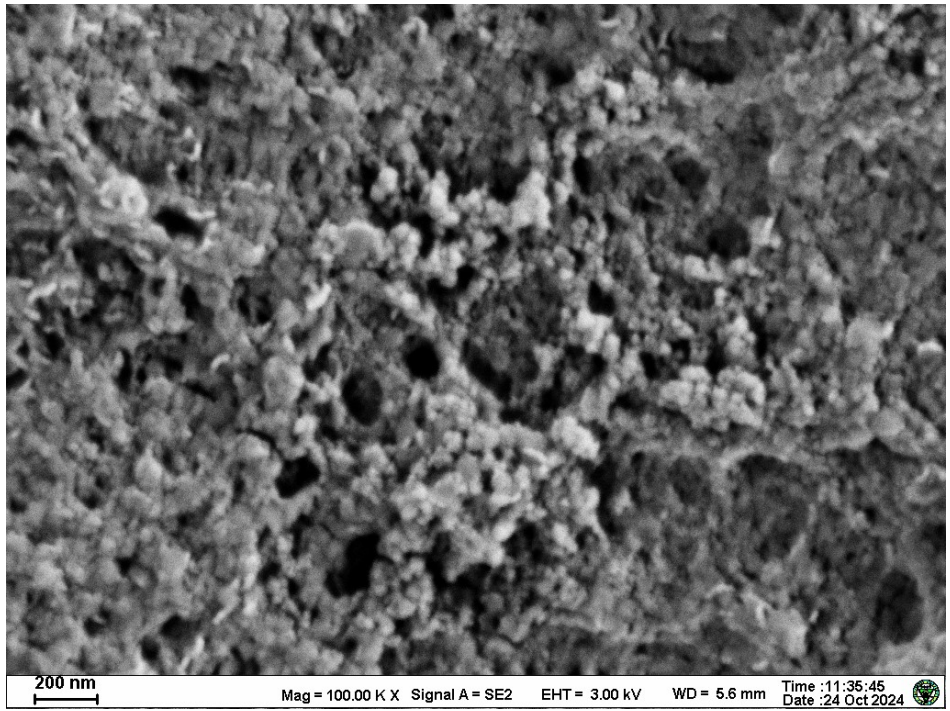

Figure S20. The SEM image of Co<sub>2</sub>NiFe-CA after CP at 250 mA cm<sup>-2</sup>.
